# Supplementary material
Source: publisher figshare collection journal article supplement (https://acs.figshare.com/ndownloader/files/4152520)
Supplement: Supplementary file 1 [file 4152520]

**Supplementary table S1.** Effect of CCT129202 on reversing ABCB1-mediated MDR in KBv200 cells with different expression of ABCB1

| KBv200 cells  | IC <sub>50</sub> ±SD (μM; fold-reversal) |                 |                            |                 |
|---------------|------------------------------------------|-----------------|----------------------------|-----------------|
|               | Doxorubicin                              | fold-reversal 1 | Doxorubicin+0.5μMCCT129202 | fold-reversal 2 |
| control       | 4.326 ± 1.190                            | (1.00)          | 1.072 ± 0.041 **           | (4.04)          |
| NC-siRNA      | 4.625 ± 0.536                            | (0.94)          | 1.277 ± 0.183 **           | (3.39)          |
| ABCB1-siRNA-1 | 4.476 ± 0.422                            | (0.97)          | 1.254 ± 0.329 **           | (3.45)          |
| ABCB1-siRNA-2 | 1.345 ± 0.162 **                         | (3.22)          | 0.740 ± 0.076 **           | (5.84)          |
| ABCB1-siRNA-3 | 1.191 ± 0.122 **                         | (3.63)          | 0.765 ± 0.071 **           | (5.65)          |

NOTE: “fold-reversal 1”=IC<sub>50</sub> of control/ IC<sub>50</sub> of cells treated with doxorubicin alone; “fold-reversal 2”= IC<sub>50</sub> of control /IC<sub>50</sub> of cells treated with doxorubicin +0.5μMCCT129202. Cell survival was performed by MTT assay as described in Materials and Methods. Data are shown as the mean ± standard deviation (SD) of at least three independent experiments performed in triplicate. \*\*,  $p < 0.01$  for values versus that obtained in the absence of CCT129202 in KBv200 cells. *This material is available free of charge via the Internet at <http://pubs.acs.org>*

**Supplementary table S2 The clinical characteristics of 20 patients with esophageal carcinomas in TECIA study**

| NO. | Sex    | Age<br>(years) | Tumor<br>location | Histological<br>grading | TNM<br>classification | Expression of<br>ABCB1 | Inhibit Rate (%) |             |                      |
|-----|--------|----------------|-------------------|-------------------------|-----------------------|------------------------|------------------|-------------|----------------------|
|     |        |                |                   |                         |                       |                        | Paclitaxel       | CCT129202   | CCT129202+Paclitaxel |
| 1   | Male   | 55             | Middle            | PD                      | T3N0M0                | Negative               | 79.5 ± 17.5      | -7.0 ± 10.8 | 82.2 ± 12.7          |
| 2   | Female | 62             | Middle            | PD                      | T3N0M0                | Positive (++)          | 23.0 ± 9.8       | 3.0 ± 5.7   | 59.9 ± 12.6          |
| 3   | Male   | 69             | Middle            | PD                      | T3N2M0                | Negative               | 53.8 ± 14.2      | 5.3 ± 2.5   | 50.1 ± 4.3           |
| 4   | Male   | 69             | Middle            | MD                      | T2N0M0                | Negative               | 48.9 ± 14.6      | 27.1 ± 11.2 | 46.3 ± 22.3          |
| 5   | Male   | 54             | Lower             | MD                      | T3N0M0                | Negative               | 57.7 ± 13.8      | -5.0 ± 5.42 | 49.9 ± 18.4          |
| 6   | Male   | 74             | Lower             | MD                      | T3N0M0                | Negative               | 44.8 ± 1.7       | 2.3 ± 7.9   | 32.8 ± 22.7          |
| 7   | Male   | 55             | Lower             | MD                      | T3N2M0                | Negative               | 77.6 ± 20.6      | 8.3 ± 9.2   | 90.9 ± 30.3          |
| 8   | Female | 68             | Middle            | MD                      | T3N1M0                | Negative               | 3.4 ± 3.2        | 3.76 ± 8.7  | 44.3 ± 14.0          |
| 9   | Male   | 50             | Lower             | MD                      | T3N1M0                | Positive (+++)         | 24.3 ± 24.0      | -5.1 ± 8.4  | 73.5 ± 5.9           |
| 10  | Female | 48             | Middle            | MD                      | T3N1M0                | Negative               | 87.4 ± 14.0      | 37.6 ± 17.6 | 97.1 ± 4.4           |
| 11  | Male   | 67             | Lower             | MD                      | T3N0M0                | Negative               | 83.9 ± 16.2      | 17.9 ± 2.1  | 72.1 ± 16.7          |
| 12  | Male   | 58             | Middle            | WD                      | T3N0M0                | Negative               | 46.3 ± 11.8      | 10.8 ± 3.9  | 72.4 ± 22.8          |
| 13  | Male   | 66             | Lower             | MD                      | T2N2M0                | Negative               | 42.4 ± 27.0      | 30.1 ± 5.2  | 60.9 ± 26.1          |
| 14  | Male   | 67             | Middle            | WD                      | T3N0M0                | Negative               | 22.7 ± 3.9       | 24.3 ± 9.4  | 45.4 ± 9.9           |
| 15  | Male   | 47             | Lower             | MD                      | T3N0M0                | Negative               | 39.4 ± 9.2       | 14.1 ± 11.8 | 60.8 ± 30.4          |
| 16  | Male   | 70             | Middle            | MD                      | T3N0M0                | Positive (+)           | 9.70 ± 5.0       | 4.3 ± 2.0   | 61.2 ± 29.8          |
| 17  | Male   | 44             | Middle            | WD                      | T3N0M0                | Negative               | 42.2 ± 10.5      | 5.3 ± 10.2  | 54.4 ± 6.2           |
| 18  | Male   | 76             | Middle            | MD                      | T3N0M0                | Negative               | 75.2 ± 3.3       | 27.8 ± 4.3  | 92.0 ± 4.6           |
| 19  | Female | 58             | Middle            | MD                      | T3N0M0                | Negative               | 50.8 ± 28.2      | -3.1 ± 7.3  | 83.0 ± 16.7          |
| 20  | Male   | 47             | Middle            | PD                      | T3N2M0                | Negative               | 91.4 ± 9.05      | -6.9 ± 3.8  | 91.2 ± 14.3          |

NOTE: Tumor histoculture end-point staining computer-image-analysis (TECIA) was performed as described in Materials and Methods section. Experiments were performed in quadruplicate and inhibition rate was shown as mean ± SD. Positive staining of IHC was graded as follows: (+) low-intensity; (++) moderate-intensity; (+++) high-intensity. PD: poorly differentiated; WD: well differentiated; MD: moderately differentiated. *This material is available free of charge via the Internet at <http://pubs.acs.org>*
